# Supplementary material for: Oxidation and phase transfer of individual Cr-doped dendritic FeOx particles visualized by full-field nano-XAFS spectroimaging
Source: Royal Society of Chemistry journal article supplement (doi:10.1039/d3cp00907f), 2023-01-01
Supplement: d3cp00907f1.pdf [file d3cp00907f1.pdf]

**Electronic Supplementary Information (ESI)**

**ESI 1. Details on full-field nano-XAFS measurements**

**Table S1. The energy list of full-field nano-XAFS measurements**

| <b>Block</b> | <b>Energy range /eV</b> | <b>Energy space /eV</b> | <b>Number of the energy point</b> | <b>Exposure time /s</b> |
|--------------|-------------------------|-------------------------|-----------------------------------|-------------------------|
| 1            | 7000–7090               | 10                      | 10                                | 10                      |
| 2            | 7100–7134.65            | 0.35                    | 100                               | 10                      |
| 3            | 7135–7159               | 1                       | 25                                | 10                      |
| 4            | 7160–7200               | 2.67                    | 15                                | 10                      |

## ESI 2. Details on Analysis of full-field nano-XAFS spectra

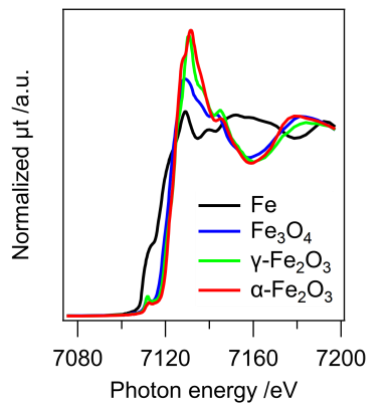

**Figure S1.** Fe *K*-edge XAFS spectra of Fe standard samples for XANES analysis.

## Scheme S1. Analysis of spatially resolved Fe K-edge XAFS for dendritic FeO<sub>x</sub> and Cr-FeO<sub>x</sub>

### Linear combination fitting (LCF) equation of spatially resolved XAFS

$$\mu(x, y, E) = \underbrace{\epsilon_0(x, y, E) + \epsilon_1(x, y) \cdot (E - E_0)}_{\text{background}} + \underbrace{c_{\text{Fe}_3\text{O}_4}(x, y)\mu_{\text{Fe}_3\text{O}_4}(E)}_{\text{Fe}_3\text{O}_4} + \underbrace{c_{\gamma\text{-Fe}_2\text{O}_3}(x, y)\mu_{\gamma\text{-Fe}_2\text{O}_3}(E)}_{\gamma\text{-Fe}_2\text{O}_3} + \underbrace{c_{\alpha\text{-Fe}_2\text{O}_3}(x, y)\mu_{\alpha\text{-Fe}_2\text{O}_3}(E)}_{\alpha\text{-Fe}_2\text{O}_3}$$

$E_0 = 7111.2 \text{ eV}$        $\mu_{\text{Fe}_3\text{O}_4}(E)$ ,  $\mu_{\gamma\text{-Fe}_2\text{O}_3}(E)$ ,  $\mu_{\alpha\text{-Fe}_2\text{O}_3}(E)$  : standard Fe K-edge XANES spectra of Fe<sub>3</sub>O<sub>4</sub>, γ-Fe<sub>2</sub>O<sub>3</sub>, and α-Fe<sub>2</sub>O<sub>3</sub>

### Estimation of Fe chemical state parameters

$$\text{Fe density: } \rho(x, y) = c_{\text{Fe}_3\text{O}_4}(x, y) + c_{\gamma\text{-Fe}_2\text{O}_3}(x, y) + c_{\alpha\text{-Fe}_2\text{O}_3}(x, y)$$

$$\text{Fe valence: } v(x, y) = \frac{\frac{8}{3}c_{\text{Fe}_3\text{O}_4}(x, y) + 3\{c_{\gamma\text{-Fe}_2\text{O}_3}(x, y) + c_{\alpha\text{-Fe}_2\text{O}_3}(x, y)\}}{\rho(x, y)}$$

$$\text{FeO}_x \text{ phase proportion: } \boldsymbol{\eta}(x, y) = (\eta_{\text{Fe}_3\text{O}_4}(x, y), \eta_{\gamma\text{-Fe}_2\text{O}_3}(x, y), \eta_{\alpha\text{-Fe}_2\text{O}_3}(x, y))$$

$$= \left( \frac{c_{\text{Fe}_3\text{O}_4}(x, y)}{\rho(x, y)}, \frac{c_{\gamma\text{-Fe}_2\text{O}_3}(x, y)}{\rho(x, y)}, \frac{c_{\alpha\text{-Fe}_2\text{O}_3}(x, y)}{\rho(x, y)} \right)$$

### Probability density (kernel density) estimation

$$\boldsymbol{\mu} = \begin{pmatrix} c_{\text{Fe}_3\text{O}_4} \\ c_{\gamma\text{-Fe}_2\text{O}_3} \\ c_{\alpha\text{-Fe}_2\text{O}_3} \end{pmatrix} = \begin{pmatrix} \eta_{\text{Fe}_3\text{O}_4} \\ \eta_{\gamma\text{-Fe}_2\text{O}_3} \\ \eta_{\alpha\text{-Fe}_2\text{O}_3} \end{pmatrix} \boldsymbol{\rho} = \boldsymbol{\eta} \boldsymbol{\rho}$$

- Kernel density for 1 pixel

$$p_i(\boldsymbol{\mu}) = \mathcal{N}(\boldsymbol{\mu}_i, \boldsymbol{\Sigma}_i) = \frac{1}{(2\pi)^{\frac{3}{2}} \sqrt{|\boldsymbol{\Sigma}_i|}} \exp \left\{ -\frac{1}{2} {}^t(\boldsymbol{\mu} - \boldsymbol{\mu}_i) \boldsymbol{\Sigma}_i^{-1} (\boldsymbol{\mu} - \boldsymbol{\mu}_i) \right\}$$

$$= \frac{1}{(2\pi)^{\frac{3}{2}} \sqrt{|\boldsymbol{\Sigma}_i|}} \exp \left\{ -\frac{1}{2} {}^t(\boldsymbol{\eta} \boldsymbol{\rho} - \boldsymbol{\mu}_i) \boldsymbol{\Sigma}_i^{-1} (\boldsymbol{\eta} \boldsymbol{\rho} - \boldsymbol{\mu}_i) \right\}$$

$$= p_i(\boldsymbol{\eta}, \boldsymbol{\rho})$$

$$\boldsymbol{\mu}_i = \begin{pmatrix} a_i \\ b_i \\ c_i \end{pmatrix} : \text{estimated value of LCF} \quad \boldsymbol{\Sigma}_i : \text{covariation matrix of LCF (3} \times \text{3)}$$

- Kernel density in (ρ, η)-space

$$P(\boldsymbol{\rho}, \boldsymbol{\eta}) = \frac{1}{N} \sum_{i=0}^{N-1} p_i(\boldsymbol{\rho}, \boldsymbol{\eta})$$

- Kernel density in η-space

$$P(\boldsymbol{\eta}) = \frac{1}{N} \int_0^\infty \sum_{i=0}^{N-1} p_i(\boldsymbol{\rho}, \boldsymbol{\eta}) \rho^2 d\rho$$

## Discussion on the validity of the linear combined curve-fitting analysis

To confirm the validity of this three-phase linear combined fitting analysis, we have conducted principal component analysis (PCA) to the all valid spatially-resolved XAFS data in the  $\text{FeO}_x$  and  $\text{Cr-FeO}_x$  particles in this paper, after background removal, normalization, and data centering by subtracting the average XAFS of all pixels. The cumulative contribution in PCA for up to 20 elements showed that above 5 elements exceeded 50% (Figure S2a). Then, we have conducted multivariate curve resolution alternating least squares (MCR-ALS) analysis on 20 spectral elements, with the difference spectra of the three phases ( $\text{Fe}_3\text{O}_4$ ,  $\gamma\text{-Fe}_2\text{O}_3$ , and  $\alpha\text{-Fe}_2\text{O}_3$ ) as the initial values of the spectral matrix, showed that the structure according three phases remain roughly in the first three elements (Figure S2bc). The rest of the spectra components in Figure S2b do not attribute to essential XAFS characteristics, but rather structure before the edge around 7100–7120 eV. They could be associated with components corresponding to remnants of background, distortions in the illumination light field, or artifacts from FZP imaging. These contributions to the background structure near the pre-edge may correspond to elements with cumulative contributions exceeding 50% in the PCA other than the main components of  $\text{Fe}_3\text{O}_4$ ,  $\gamma\text{-Fe}_2\text{O}_3$ , and  $\alpha\text{-Fe}_2\text{O}_3$ . The concentration matrix obtained from the MCR-ALS analysis was found to be in good agreement with the phase distribution described in this paper, indicating the validity of this curve-fitting analysis.

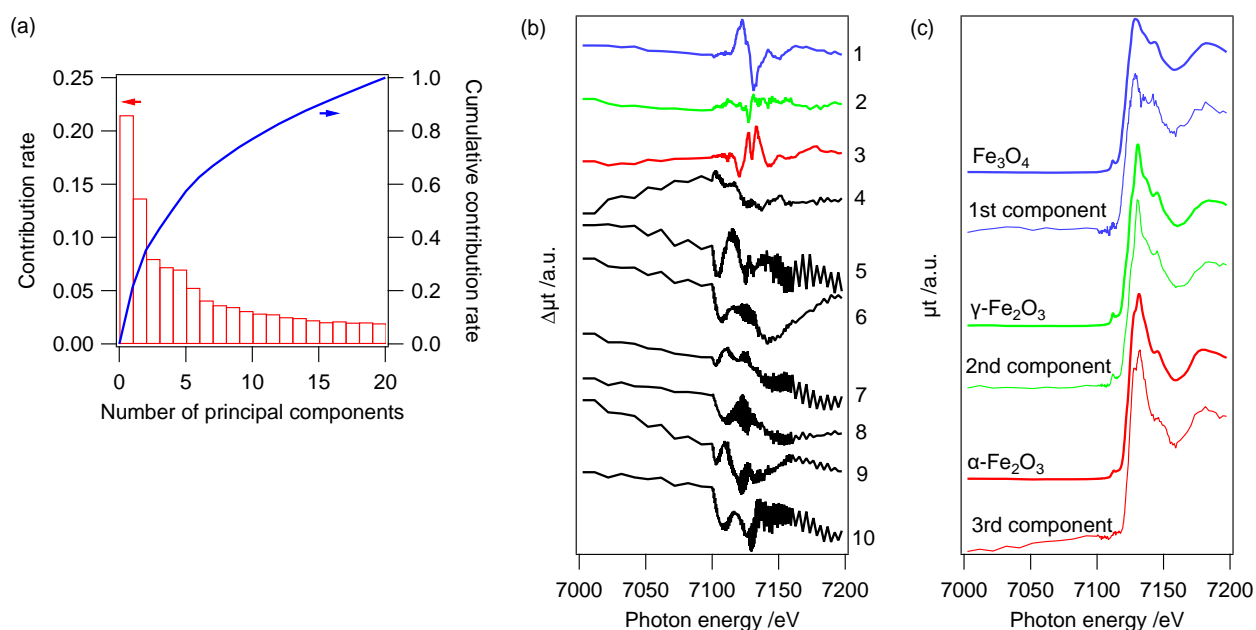

**Figure S2.** (a) The contribution (red) and cumulative contribution (blue) rates of the PCA analysis up to 20 components. (b) The difference spectra ( $\Delta\mu t$ ) of the first 10 components of the MCR-ALS analysis, and (c) the XANES spectra of the three reference compounds of  $\text{Fe}_3\text{O}_4$ ,  $\gamma\text{-Fe}_2\text{O}_3$ , and  $\alpha\text{-Fe}_2\text{O}_3$  and those estimated by the summation of the average spectrum and the difference spectrum of the 1st/2nd/3rd component. These XANES spectra of the three components were similar to those of the reference compounds.

### ESI 3. Details on full-field nano-XAFS spectra analysis results

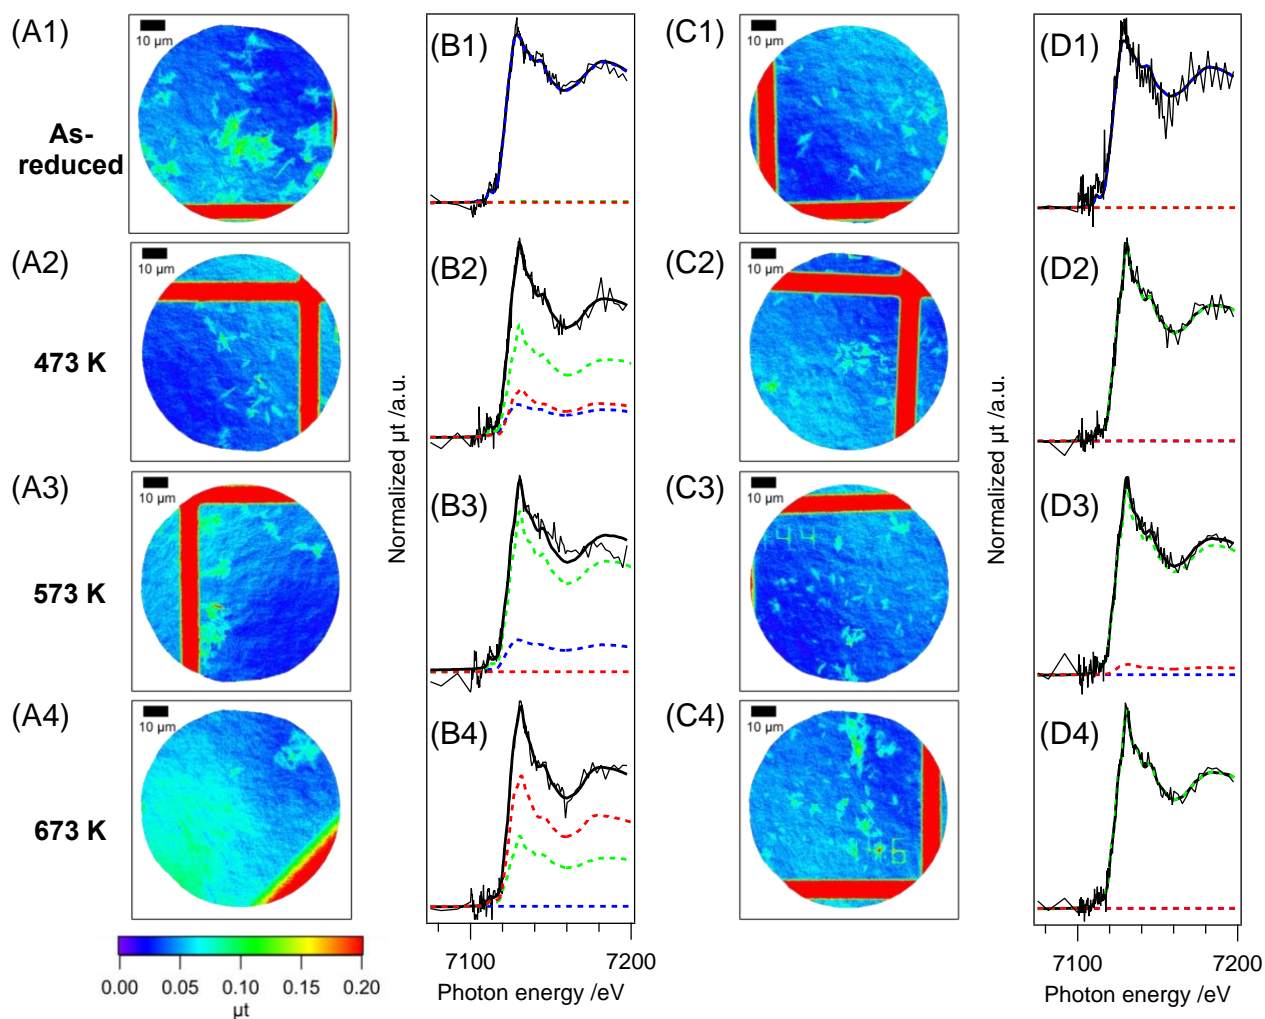

**Figure S3.** (A, C) Full-field absorption images at 7.130 keV and (B, D) integrated XAFS spectra of the particle regions in the full-field images for (A, B) dendritic  $\text{FeO}_x$  and (C, D) dendritic 10 wt%  $\text{Cr-FeO}_x$  (1) as reduced, and after oxidation at (2) 473, (3) 573, and (4) 673 K. Black solid lines in B, D: observed data; black bold lines in B, D: linear combination fitting data; blue dashed bold lines in B, D:  $\text{Fe}_3\text{O}_4$  phase fraction; green dashed bold lines in B, D:  $\gamma\text{-Fe}_2\text{O}_3$  phase fraction; red dashed bold lines in B, D:  $\alpha\text{-Fe}_2\text{O}_3$  phase fraction.

## (I) FeO<sub>x</sub>

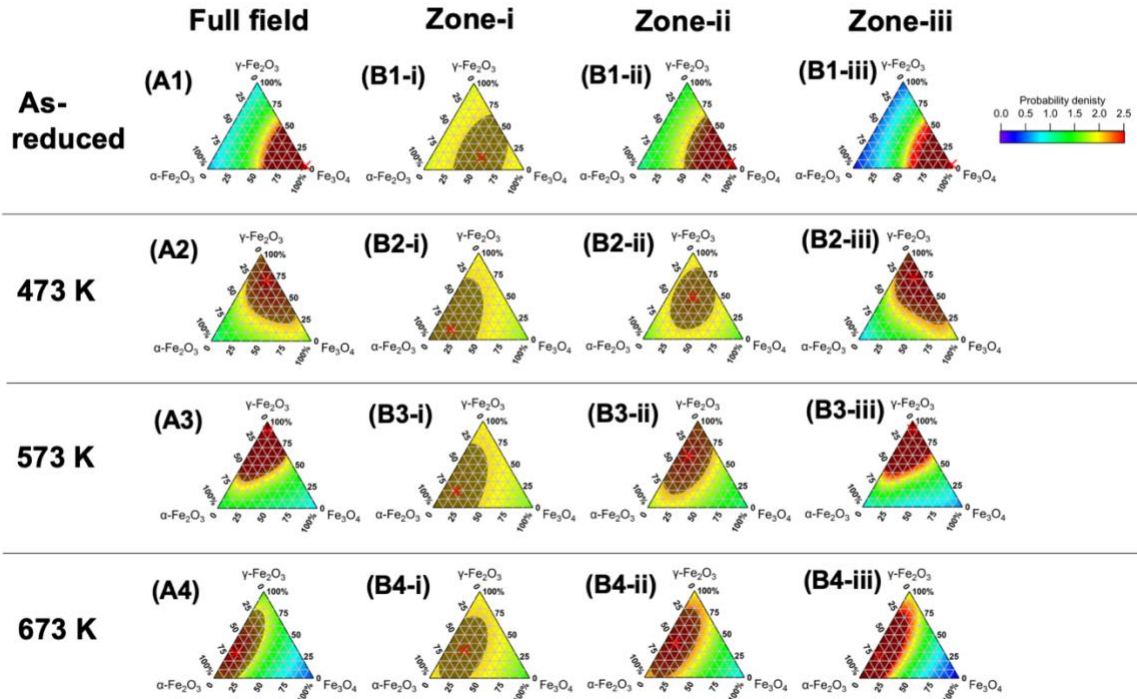

## (II) 10 wt% Cr-FeO<sub>x</sub>

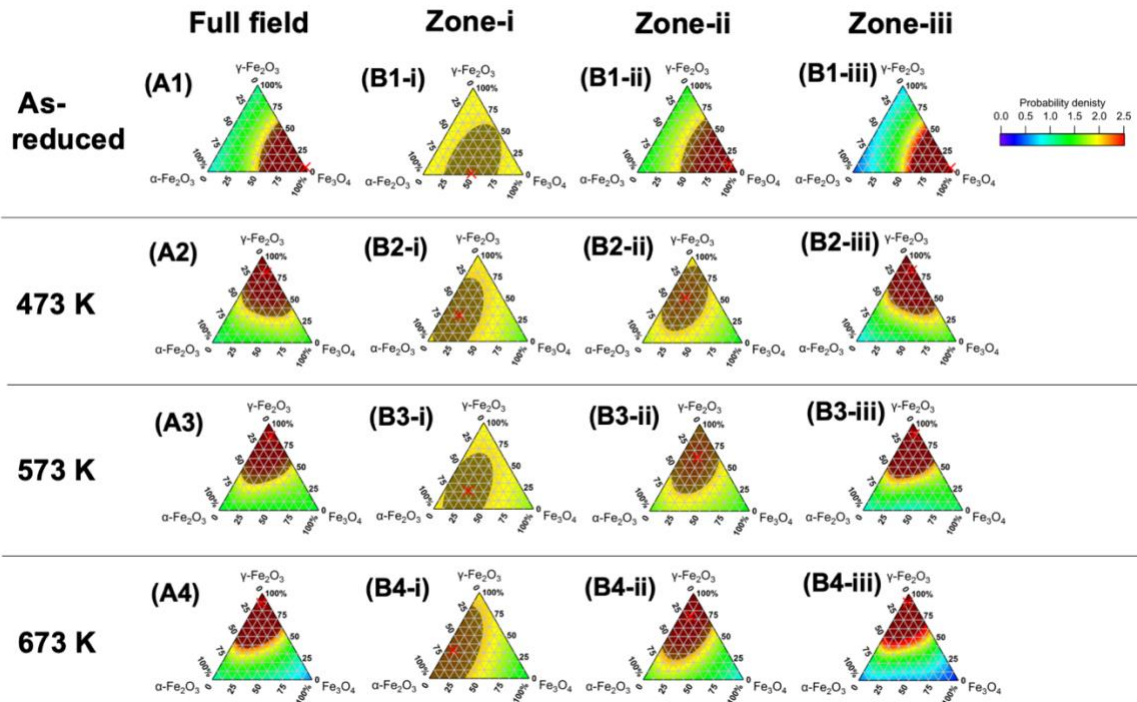

**Figure S4.** (A) Ternary probability density diagrams of the Fe phases and (B) ternary posterior probability density diagrams in specific Fe density ( $\Delta\mu t$ ) range zones (i)–(iii) of (I) dendritic FeO<sub>x</sub> particles and (II) dendritic 10 wt% Cr-FeO<sub>x</sub> particles, which are the same as in Figs. 5A and C and 6A and C. Maximum probability density points (x) and probable 50% phase proportion area are shown in transparent black. (1) As-reduced and after oxidation at (2) 473 K, (3) 573 K, and (4) 673 K.

**Table S2. Maximum probability density  $P(\eta_{\max})$ , maximum posterior probability density  $p(\eta_{\max}|\text{(i), (ii), or (iii)})$ , and Fe phase proportion coordinates at the maxima ( $\eta_{\max}$ ) in the ternary diagrams in Figs. 5 and 6**

| Sample Condition                            | Full-field         |                 | Zone-(i)                    |                 | Zone-(ii)                    |                 | Zone-(iii)                    |                 |           |
|---------------------------------------------|--------------------|-----------------|-----------------------------|-----------------|------------------------------|-----------------|-------------------------------|-----------------|-----------|
|                                             | $P(\eta_{\max})$   | $\eta_{\max}$ % | $P(\eta_{\max} \text{(i)})$ | $\eta_{\max}$ % | $P(\eta_{\max} \text{(ii)})$ | $\eta_{\max}$ % | $P(\eta_{\max} \text{(iii)})$ | $\eta_{\max}$ % |           |
| Dendritic<br>FeO <sub>x</sub>               | As-reduced         | 7.462           | (96,0,4)                    | 2.071           | (51,12,37)                   | 3.228           | (90,6,4)                      | 10.546          | (96,4,0)  |
|                                             | Oxidation at 473 K | 2.423           | (21,68,11)                  | 2.083           | (16,12,72)                   | 2.175           | (25,47,29)                    | 2.6356          | (20,71,9) |
|                                             | Oxidation at 573 K | 4.011           | (6,89,5)                    | 2.093           | (14,18,68)                   | 2.409           | (11,59,30)                    | 5.119           | (5,89,6)  |
|                                             | Oxidation at 673 K | 2.243           | (7,28,65)                   | 2.115           | (18,29,53)                   | 2.518           | (11,39,50)                    | 3.521           | (6,26,68) |
| Dendritic<br>10 wt %<br>Cr-FeO <sub>x</sub> | As-reduced         | 5.031           | (95,5,0)                    | 2.055           | (47,1,52)                    | 2.815           | (86,9,5)                      | 7.317           | (96,4,0)  |
|                                             | Oxidation at 473 K | 2.883           | (14,81,5)                   | 3.060           | (16,29,55)                   | 2.219           | (16,52,32)                    | 3.250           | (14,82,4) |
|                                             | Oxidation at 573 K | 3.519           | (9,85,6)                    | 2.068           | (24,20,56)                   | 2.310           | (15,62,23)                    | 4.053           | (8,87,5)  |
|                                             | Oxidation at 673 K | 4.332           | (4,88,8)                    | 2.268           | (7,32,61)                    | 2.709           | (10,73,17)                    | 5.900           | (4,90,6)  |

Fe phase proportion coordinates are defined as  $\boldsymbol{\eta} = (\eta_{\text{Fe}_3\text{O}_4}, \eta_{\gamma\text{-Fe}_2\text{O}_3}, \eta_{\alpha\text{-Fe}_2\text{O}_3})$ , where  $\eta_{\text{Fe}_3\text{O}_4}$ ,  $\eta_{\gamma\text{-Fe}_2\text{O}_3}$ , and  $\eta_{\alpha\text{-Fe}_2\text{O}_3}$  are proportions of the Fe<sub>3</sub>O<sub>4</sub>,  $\gamma\text{-Fe}_2\text{O}_3$ , and  $\alpha\text{-Fe}_2\text{O}_3$  phases, respectively.
